# Supplementary material for: Computing Ka and Ks with a consideration of unequal transitional substitutions
Source: PubMed Central journal article supplement (PMC1552089; doi:10.1186/1471-2148-6-44), 2006-06-02
Supplement: 1471-2148-6-44-S1.pdf [file 1471-2148-6-44-S1.pdf]

# Computing Ka and Ks with a consideration of unequal transitional substitutions

Zhang Zhang<sup>1,2,3#</sup>, Jun Li<sup>2#</sup>, Jun Yu<sup>1,2,4\*</sup>

1. Institute of Computing Technology, Chinese Academy of Sciences, Beijing 100080, China
2. Beijing Genomics Institute, Chinese Academy of Sciences, Beijing 101300, China
3. Graduate School of Chinese Academy of Sciences, Beijing 100039, China
4. James D. Watson Institute of Genome Sciences of Zhejiang University, Hangzhou Genomics Institute, Key Laboratory of Genomic Bioinformatics of Zhejiang Province, Hangzhou 310007, China

# These authors contributed equally to this work.

\* To whom correspondence should be addressed.

## 1 Differences between the HKY and the Tamura-Nei Models

**Table S1** Nucleotide Substitution Models

|   | A            | T            | C            | G            |   | A                | T              | C              | G              |
|---|--------------|--------------|--------------|--------------|---|------------------|----------------|----------------|----------------|
|   | HKY Model    |              |              |              |   | Tamura-Nei Model |                |                |                |
| A | –            | $\beta g_T$  | $\beta g_C$  | $\alpha g_G$ | A | –                | $\beta g_T$    | $\beta g_C$    | $\alpha_R g_G$ |
| T | $\beta g_A$  | –            | $\alpha g_C$ | $\beta g_G$  | T | $\beta g_A$      | –              | $\alpha_Y g_C$ | $\beta g_G$    |
| C | $\beta g_A$  | $\alpha g_T$ | –            | $\beta g_G$  | C | $\beta g_A$      | $\alpha_Y g_T$ | –              | $\beta g_G$    |
| G | $\alpha g_A$ | $\beta g_T$  | $\beta g_C$  | –            | G | $\alpha_R g_A$   | $\beta g_T$    | $\beta g_C$    | –              |

Note:  $\alpha$ , transitional rate;  $\beta$ , transversional rate;  $\alpha_R$ , transitional rate between purines;  $\alpha_Y$ , transitional rate between pyrimidines;  $g_N$ , frequencies of nucleotide N, where  $N \in \{T, C, A, G\}$ .

## 2 Derivation of $\kappa_R$ and $\kappa_Y$

Let us derive the equations for estimating  $\kappa_R$  and  $\kappa_Y$ . Tamura and Nei (1993) used  $g_T$ ,  $g_C$ ,  $g_A$ , and  $g_G$  to represent nucleotide frequencies for T, C, A, and G, respectively. They defined  $\alpha_1$ ,  $\alpha_2$ , and  $\beta$  as transitional rates between purines and between pyrimidines, and transversional rate, respectively. They then derived the formulas (S1-S3) for the proportions of transitional differences between purines ( $P_1$ ) and between pyrimidines ( $P_2$ ) and of transversional differences ( $Q$ ) over divergence time  $t$  [1]:

$$P_1 = \frac{2g_A g_G}{g_R} \{g_R + g_Y \exp(-2\beta t) - \exp[-2(g_R \alpha_1 + g_Y \beta)t]\} \quad (S1)$$

$$P_2 = \frac{2g_T g_C}{g_Y} \{g_Y + g_R \exp(-2\beta t) - \exp[-2(g_Y \alpha_2 + g_R \beta)t]\} \quad (S2)$$

$$Q = 2g_{RGY}[1 - \exp(-2\beta t)] \quad (S3)$$

where  $g_R = g_A + g_G$  and  $g_Y = g_T + g_C$ .

Since  $P_1$ ,  $P_2$  and  $Q$  are estimable from sequence comparisons [1] and the observed number of substitutions underestimates the real number of substitutions as sequences diverge over time  $t$ , we need to calculate the real numbers of  $P_1$ ,  $P_2$  and  $Q$ , denoted as  $P_1'$ ,  $P_2'$  and  $Q'$ , respectively.

According to the Tamura-Nei Model, the formulas of  $P_1'$ ,  $P_2'$  and  $Q'$  are

$$P_1' = 4g_{AGG}\alpha_1 t \quad (S4)$$

$$P_2' = 4g_{TGC}\alpha_2 t \quad (S5)$$

$$Q' = 4g_{RGY}\beta t \quad (S6)$$

From S4–S6, we can derive the formulas for  $\kappa_R$  (S7) and  $\kappa_Y$  (S8).

$$\kappa_R = \alpha_1 / \beta = \frac{g_{RGY}P_1'}{g_{AGG}Q'} \quad (S7)$$

$$\kappa_Y = \alpha_2 / \beta = \frac{g_{RGY}P_2'}{g_{TGC}Q'} \quad (S8)$$

Since  $g_T$ ,  $g_C$ ,  $g_A$  and  $g_G$  can be estimated from compared sequences, therefore, the question now is “how to estimate  $P_1'$ ,  $P_2'$  and  $Q'$ ”. Due to the fact that the real number is often considered as a function of the observed number, we use S1–S3 and S4–S6 and obtain the formulas S9–S11 for  $P_1'$ ,  $P_2'$  and  $Q'$ , respectively.

$$P_1' = \frac{2g_{AGG}}{g_R} \left[ g_Y \log\left(1 - \frac{1}{2g_{RGY}}Q\right) - \log\left(1 - \frac{g_R}{2g_{AGG}}P_1 - \frac{1}{2g_R}Q\right) \right] \quad (S9)$$

$$P_2' = \frac{2g_{TGC}}{g_Y} \left[ g_R \log\left(1 - \frac{1}{2g_{RGY}}Q\right) - \log\left(1 - \frac{g_Y}{2g_{TGC}}P_2 - \frac{1}{2g_Y}Q\right) \right] \quad (S10)$$

$$Q' = -2g_{RGY} \log\left(1 - \frac{1}{2g_{RGY}}Q\right) \quad (S11)$$

Now, we can obtain the formulas of  $\kappa_R$  and  $\kappa_Y$  as follows.

$$\kappa_R = \alpha_1 / \beta = \frac{g_{RGY}P_1'}{g_{AGG}Q'} = \frac{\log\left(1 - \frac{g_R}{2g_{AGG}}P_1 - \frac{1}{2g_R}Q\right) - g_Y \log\left(1 - \frac{1}{2g_{RGY}}Q\right)}{g_R \log\left(1 - \frac{1}{2g_{RGY}}Q\right)} \quad (S12)$$

$$\kappa_Y = \alpha_2 / \beta = \frac{g_{RGY}P_2'}{g_{TGC}Q'} = \frac{\log\left(1 - \frac{g_Y}{2g_{TGC}}P_2 - \frac{1}{2g_Y}Q\right) - g_R \log\left(1 - \frac{1}{2g_{RGY}}Q\right)}{g_Y \log\left(1 - \frac{1}{2g_{RGY}}Q\right)} \quad (S13)$$

In order to conveniently remember the meanings of  $P_1$ ,  $P_2$  and  $Q$ , in our main manuscript we rename them as  $T_R$ ,  $T_Y$ ,  $V$ , respectively. Hence, the formulas for estimating  $\kappa_R$  and  $\kappa_Y$  are as follows.

$$a = \log\left(1 - \frac{g_R}{2g_Ag_G}T_R - \frac{1}{2g_R}V\right) \quad b = \log\left(1 - \frac{g_Y}{2g_Tg_C}T_Y - \frac{1}{2g_Y}V\right)$$

$$c = \log\left(1 - \frac{1}{2g_Rg_Y}V\right) \quad (S14)$$

$$\kappa_R = \frac{a - g_Y \times c}{g_R \times c} \quad \kappa_Y = \frac{b - g_R \times c}{g_Y \times c} \quad (S15)$$

## Reference

1. Tamura K, Nei M: **Estimation of the number of nucleotide substitutions in the control region of mitochondrial DNA in humans and chimpanzees.** *Mol Biol Evol* 1993, **10**(3):512-526.
